# Supplementary material
Source: publisher figshare collection journal article supplement (https://tandf.figshare.com/articles/dataset/_/9735185)
Supplement: Supplementary file 1 [file 1]

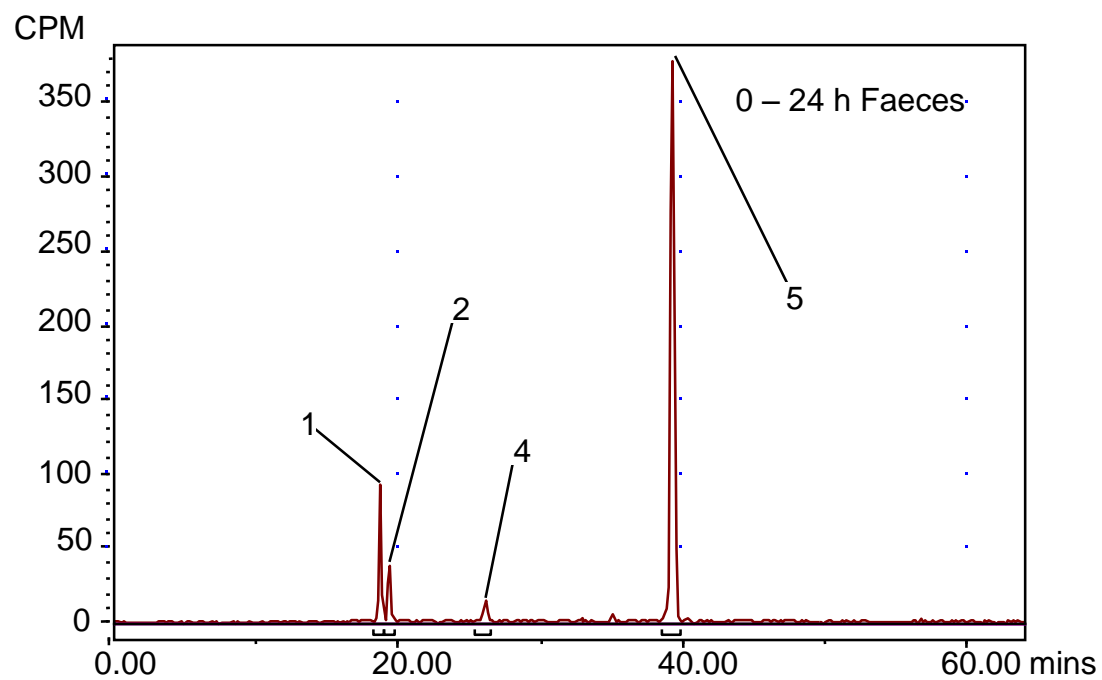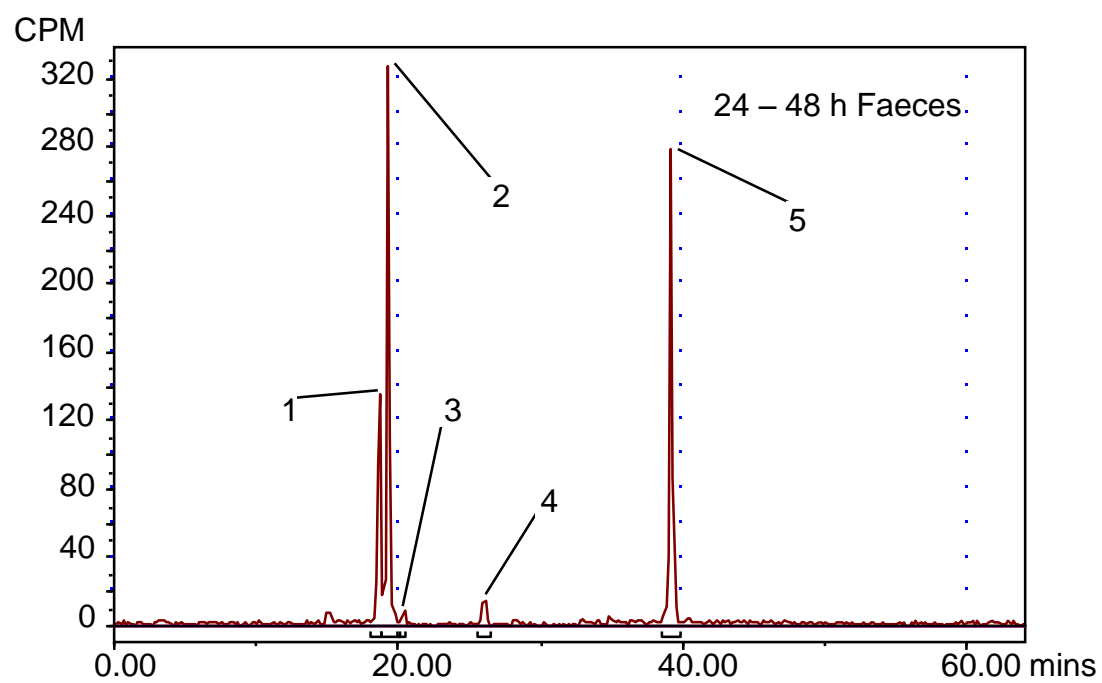

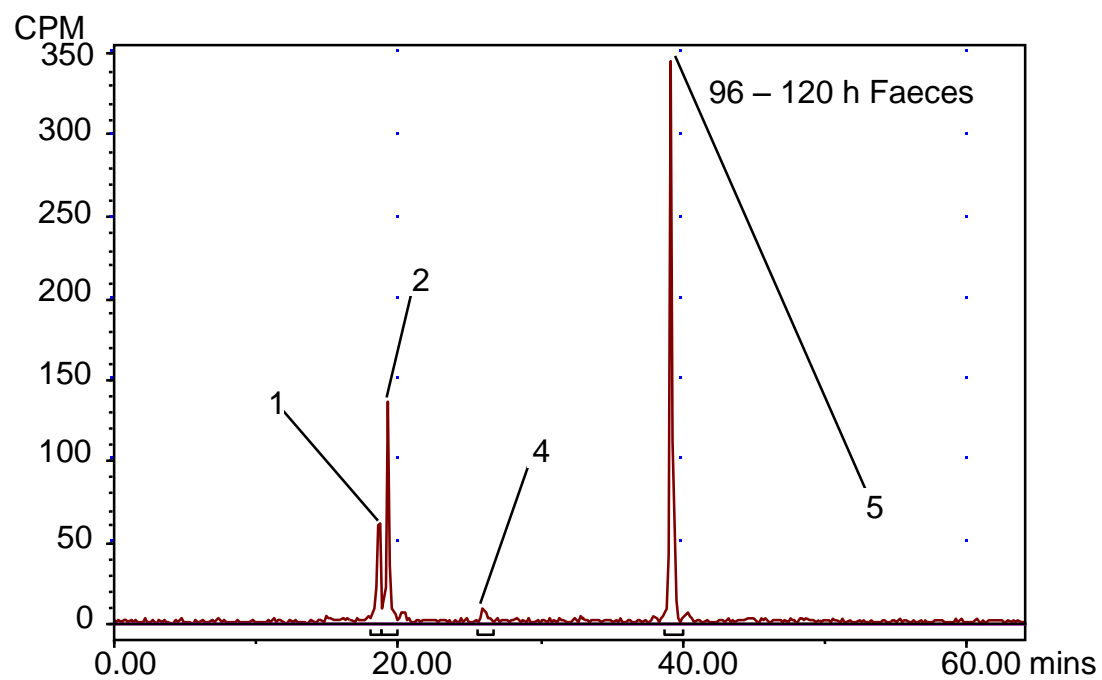

**Supplementary Figure 3. Chromatographic profile of  $^{14}\text{C}$  distribution in human faeces.** Peak identifications: 1: EGT0001301, 2: EGT0001494, 3: unidentified metabolite HM2, 4: EGT0001663, 5: bexagliflozin.
