# Supplementary material
Source: publisher figshare collection journal article supplement (https://tandf.figshare.com/articles/dataset/_/9735185)
Supplement: Supplementary file 2 [file 1]

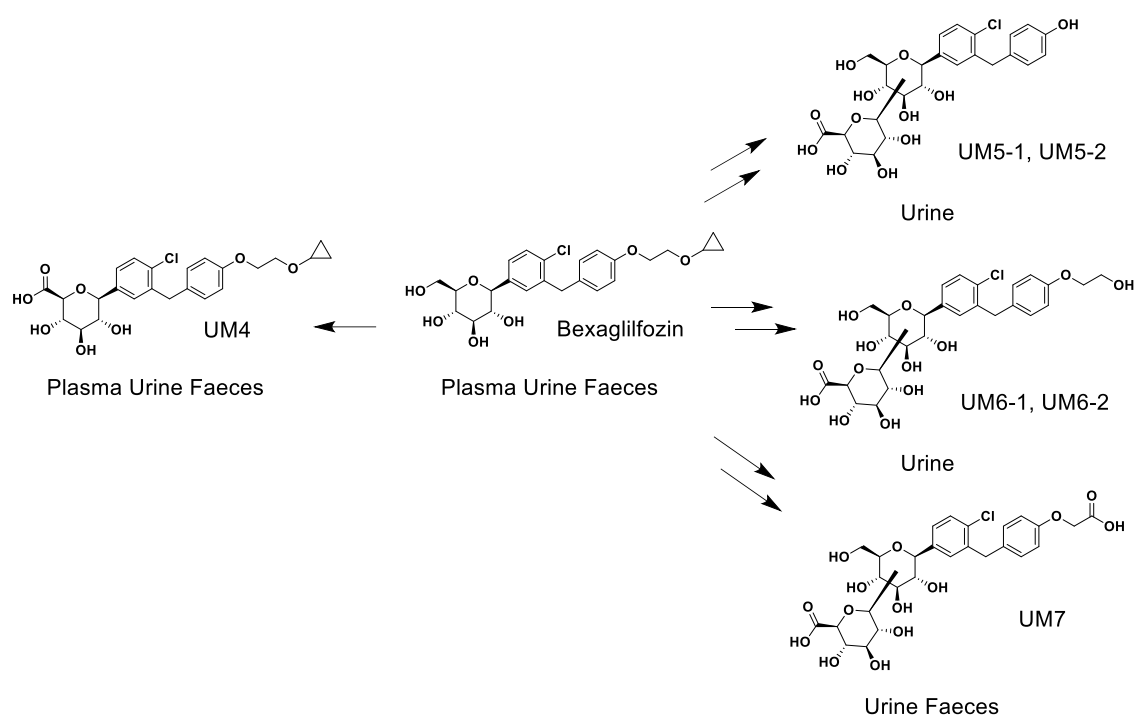

**Supplementary Figure 4. Additional metabolites identified by UPLC in human plasma, urine and faeces.** Metabolites on the right are depicted as glucose moiety *O*- $\beta$ -*D*-glucuronide adducts but exact attachments were not established.
