# Supplementary material
Source: publisher figshare collection journal article supplement (https://tandf.figshare.com/articles/dataset/_/9735185)
Supplement: Supplementary file 3 [file 1]

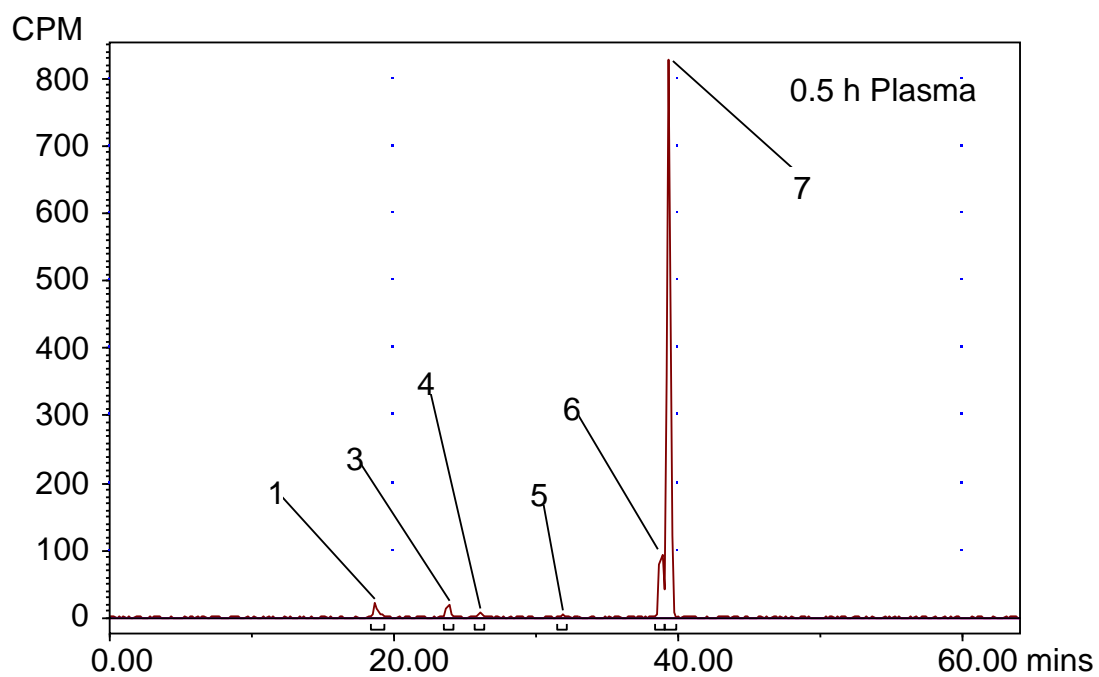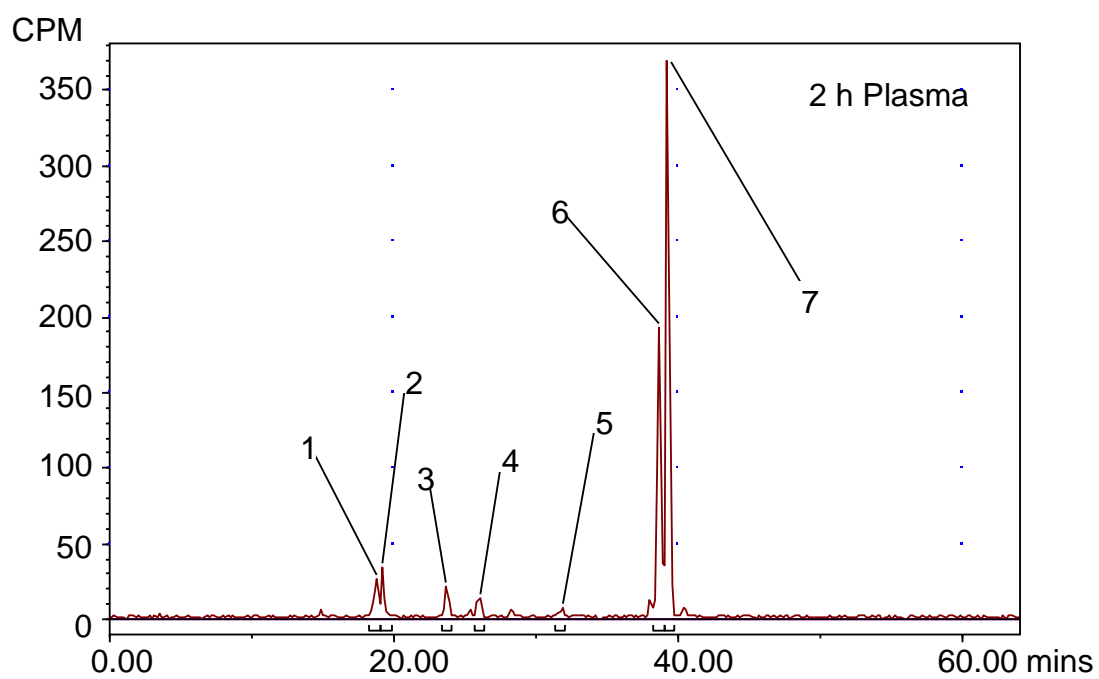

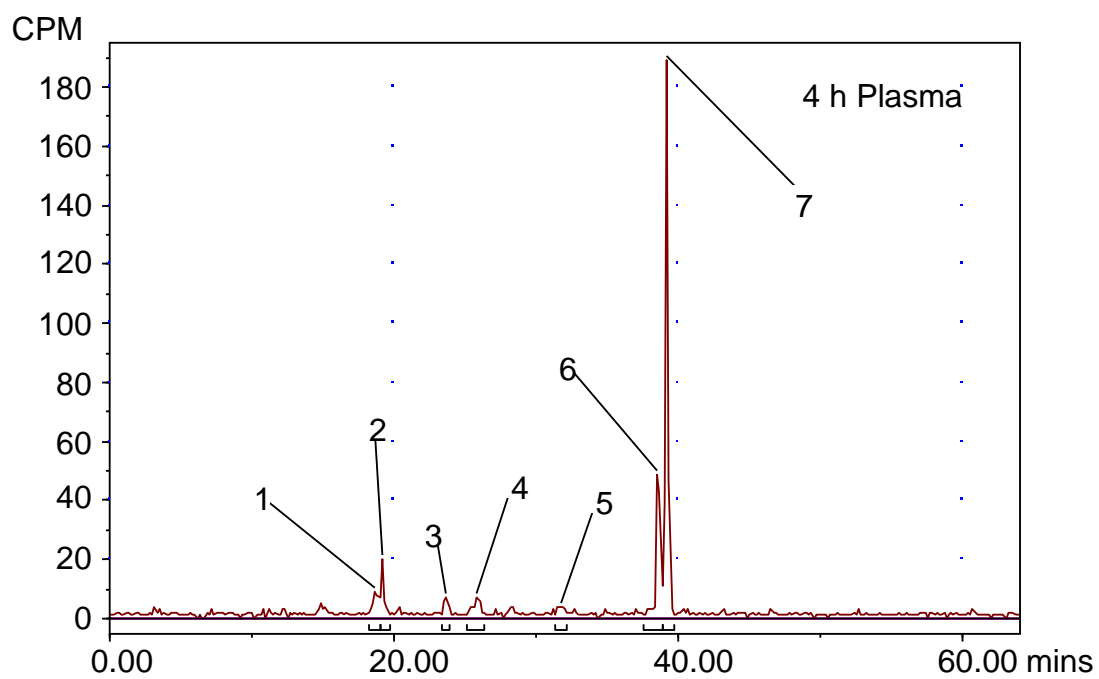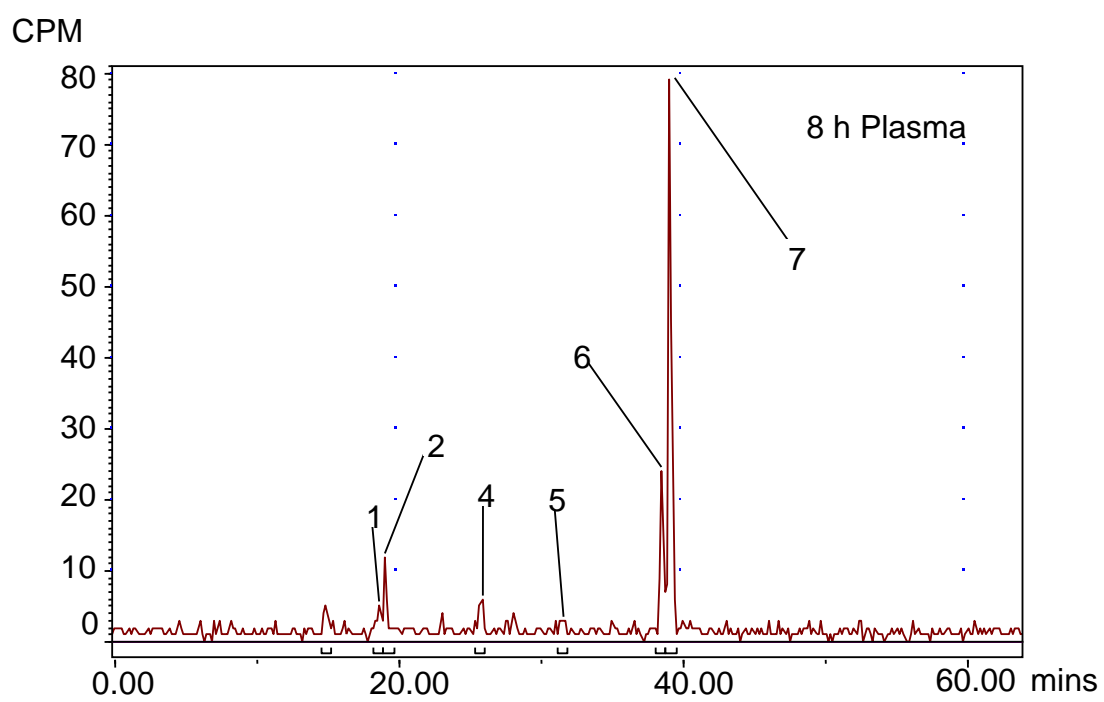

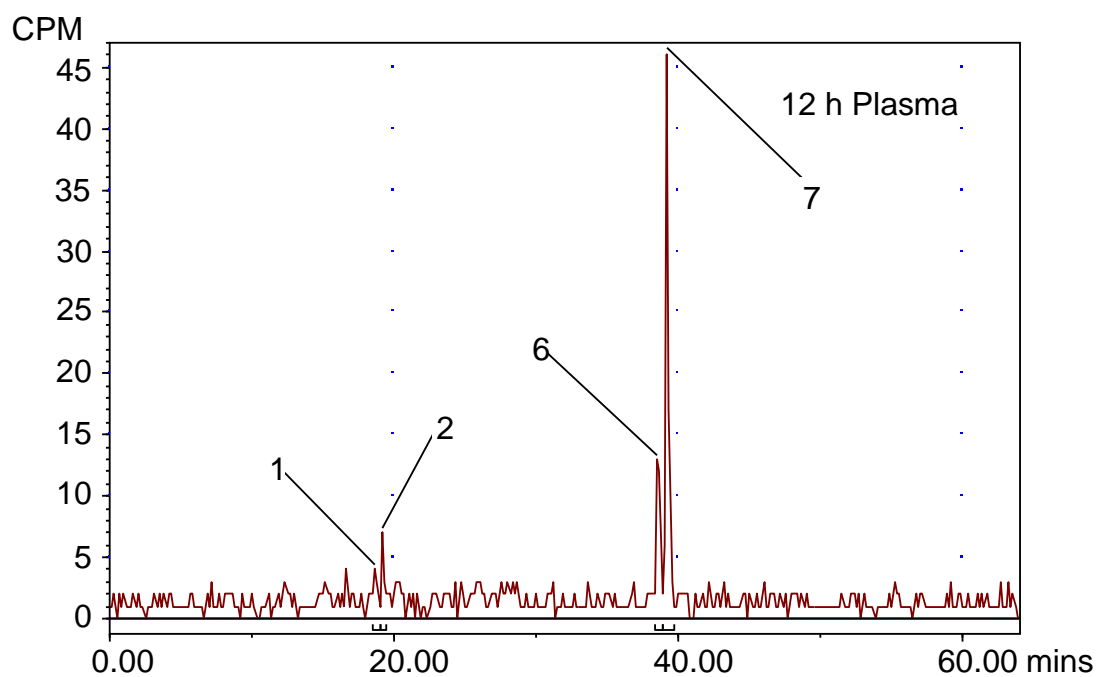

**Supplementary Figure 1. Chromatographic profile of  $^{14}\text{C}$  distribution in human plasma.** Peak identifications: 1: EGT0001301, 2: EGT0001494, 3: EGT0002147, 4: EGT0001663, 5: EGT0002148, 6: EGT0002149, 7: bexagliflozin.
