# Supplementary material
Source: publisher figshare collection journal article supplement (https://tandf.figshare.com/articles/dataset/_/9735185)
Supplement: Supplementary file 4 [file 1]

Archive with 4 entries (4 files):
- ixen_a_1654634_sm4639.pdf
- ixen_a_1654634_sm4623.pdf
- ixen_a_1654634_sm4622.pdf
- ixen_a_1654634_sm4617.pdf
