# Supplementary material
Source: publisher figshare collection journal article supplement (https://tandf.figshare.com/articles/dataset/_/9735185)
Supplement: Supplementary file 4 [file 1 › ixen_a_1654634_sm4622.pdf]

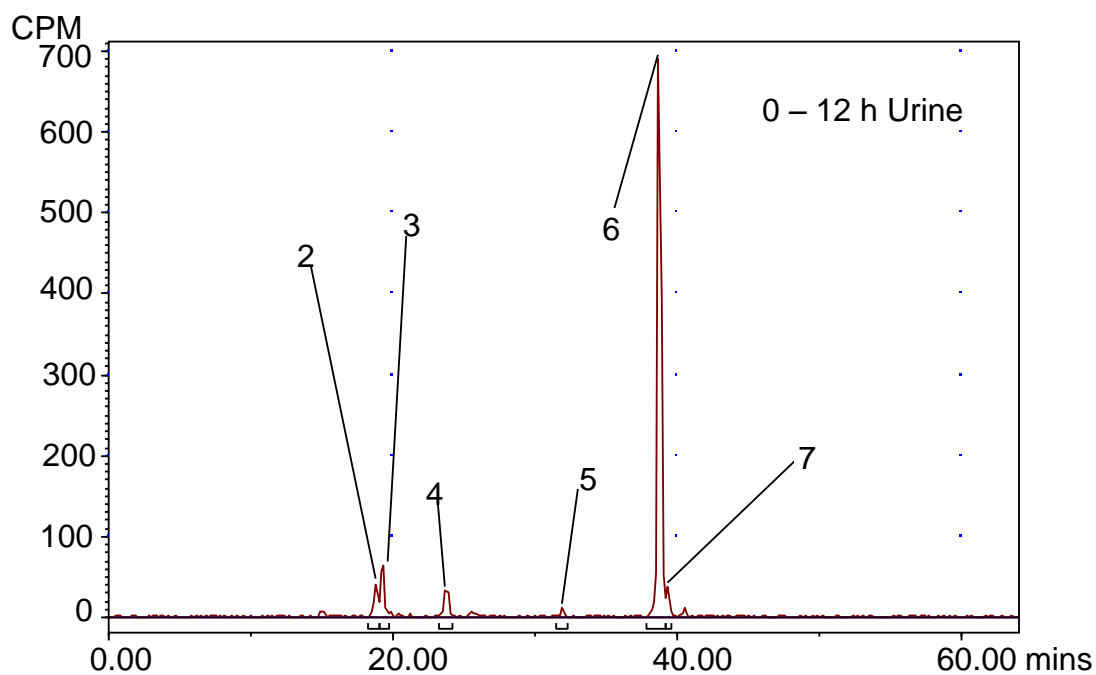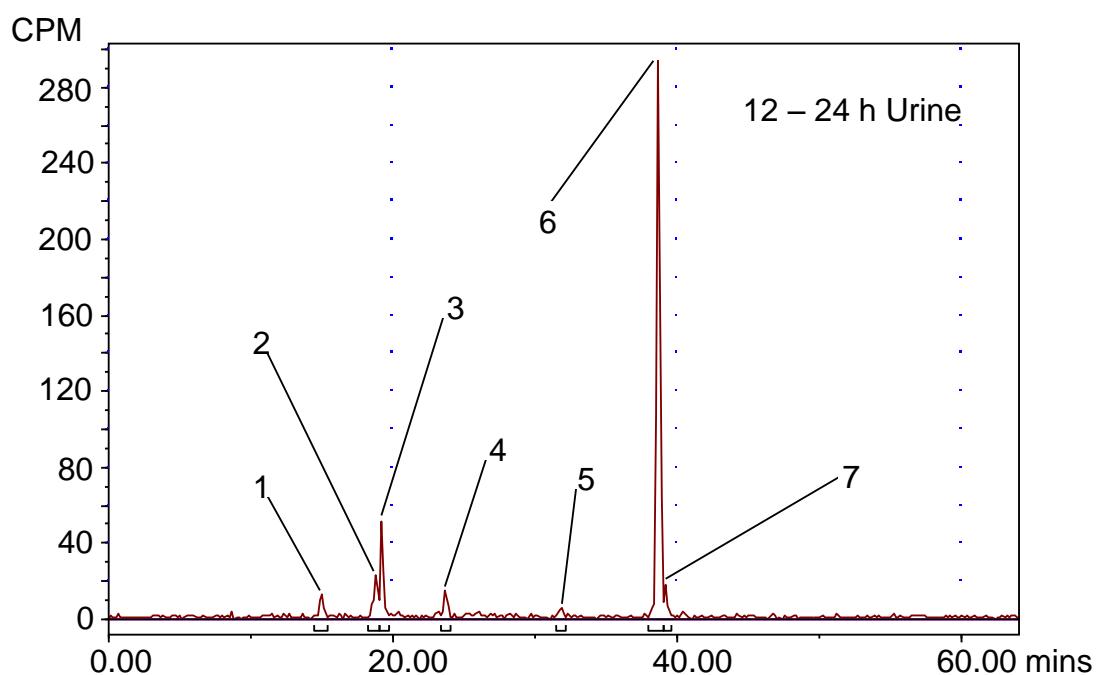

**Supplementary Figure 2. Chromatographic profile of  $^{14}\text{C}$  distribution in human urine.** Peak identifications: 1: unidentified metabolite HM1, 2: EGT0001301, 3: EGT0001494, 4: EGT0002147, 5: EGT0002148, 6: EGT0002149, 7: bexagliflozin.
